# Supplementary material for: Recent research on material-based methods for isolation of extracellular vesicles
Source: Royal Society of Chemistry journal article supplement (doi:10.1039/d4ay00370e), 2024-01-01
Supplement: d4ay00370e1.pdf [file d4ay00370e1.pdf]

## Supporting information

### Recent research on material-based methods for isolation of extracellular vesicles

Mengxi Chen<sup>1,§</sup>, Jiayi Li<sup>1,§</sup>, Yujie Lin<sup>1</sup>, Xiaowei Li<sup>2</sup>, Yuanyuan Yu<sup>1</sup>, Shenyue Zhou<sup>1</sup>,  
Fang Xu<sup>1</sup>, Qi Zhang<sup>1</sup>, Haiyang Zhang<sup>1\*</sup>, and Weipeng Wang<sup>1\*</sup>

1. College of Pharmaceutical Sciences, Soochow University, Suzhou 215123, China
2. School of Pharmacy, Collaborative Innovation Center of Advanced Drug Delivery System and Biotech Drugs in Universities of Shandong, Key Laboratory of Molecular Pharmacology and Drug Evaluation (Yantai University), Ministry of Education, Yantai University, Yantai 264005, PR China

\* Corresponding authors:

Weipeng Wang, Yunxuan Building #1339, College of Pharmaceutical Sciences, Soochow University, Wenjing Road, Suzhou Industrial Park, Suzhou 215123, China.

E-mail: [wangweipeng@suda.edu.cn](mailto:wangweipeng@suda.edu.cn); Tel/Fax: +86-512-65883761.

Haiyang Zhang, Yunxuan Building #2103, College of Pharmaceutical Sciences, Soochow University, Wenjing Road, Suzhou Industrial Park, Suzhou 215123, China.

E-mail: [hyzhang2020@suda.edu.cn](mailto:hyzhang2020@suda.edu.cn)

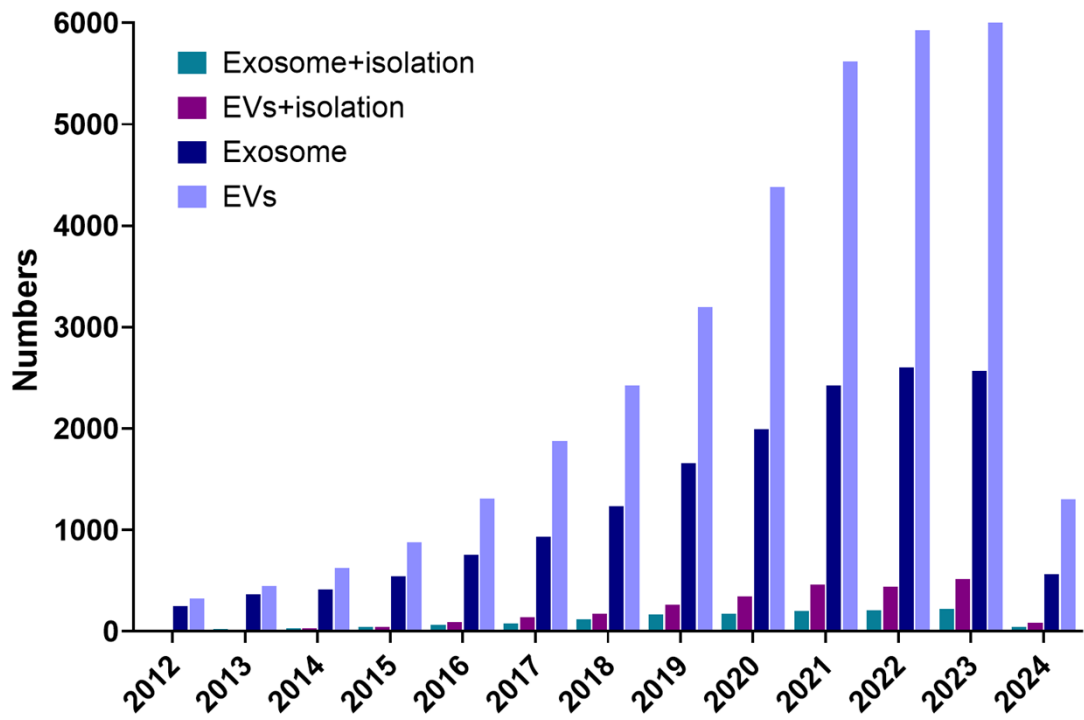

**Figure S1.** Literature survey of published articles using a search query with keywords “extracellular vesicles”, “exosome”, “extracellular vesicles and isolation” or “exosome and isolation”.

**Table S1.** Comparison of isolation methods for EVs based on materials.

| Material           | Physical Properties                            | Functions                                         | Isolation principle                                                       | Release principle                                                                                                        | Advantages                                                                   | Defects                              | Ref.                          |
|--------------------|------------------------------------------------|---------------------------------------------------|---------------------------------------------------------------------------|--------------------------------------------------------------------------------------------------------------------------|------------------------------------------------------------------------------|--------------------------------------|-------------------------------|
| Magnetic beads     | Nanometer or micro scale, magnetic             | Antibodies                                        | Specific binding of antibodies to membranes proteins of EVs               | DNase, $\beta$ -CD/ $\alpha$ -CD-AAB and Tag II/Tactin-Strep                                                             | Magnetic separation, high specificity, high purity                           | High cost and low recovery rate      | 19, 25-31                     |
|                    |                                                | Aptamers                                          | Specific binding of aptamers to membranes proteins of EVs                 | DNase and complementary                                                                                                  |                                                                              |                                      |                               |
|                    |                                                | Lipid probe                                       | The tail end of lipid probe inserted into the phospholipid bilayer of EVs | DNase, dethiobiotin/biotin-avidin                                                                                        | Magnetic separation, simple, sensitive, efficient and time-saving            | Low specificity                      | 64, 69                        |
| Micro-fluidic chip | Polymer substrate, miniaturized and integrated | Antibodies, magnetic beads or polystyrene spheres | Specific binding of antibodies to membranes proteins of EVs               | Cutble difulfide bonds, dethiobiotin/biotin-avidin and can also be directly detected by online analysis without release. | Microanalysis is suitable, time saving, high efficiency and high specificity | High equipment and low recovery rate | 20, 35, 37, 38, 40-43, 46, 48 |
|                    |                                                | containing antibodies                             |                                                                           |                                                                                                                          |                                                                              |                                      | 58                            |
|                    |                                                | Aptamers                                          | Specific binding of aptamers to membranes proteins of EVs                 |                                                                                                                          |                                                                              |                                      |                               |
|                    |                                                | Lipid probe                                       | The tail end of lipid probe inserted into the phospholipid bilayer of EVs |                                                                                                                          |                                                                              |                                      | 65                            |

| <b>Material</b>                   | <b>Physical Properties</b>                               | <b>Functions</b> | <b>Isolation principle</b>                                                                    | <b>Release principle</b> | <b>Advantages</b>                                    | <b>Defects</b>                     | <b>Ref.</b> |
|-----------------------------------|----------------------------------------------------------|------------------|-----------------------------------------------------------------------------------------------|--------------------------|------------------------------------------------------|------------------------------------|-------------|
| Paper                             | Lager number of cellulose sites                          | Antibodies       | Specific binding of antibodies to membranes proteins of EVs                                   | No release               | Simple, controllable cost and high specificity       | Low recovery and no active release | 44, 45      |
| Grapheres                         | High surface area and lager number of hydrophilic groups | Antibodies       | Specific binding of antibodies to membranes proteins of EVs                                   | No release               | High specificity and on-line processing              | Inactive release                   | 46          |
|                                   |                                                          | Ti <sup>4+</sup> | Binding of positive metal ions to phosphate groups in negative vesicle phospholipid membranes |                          | Simple, fast and high recovery rate                  | Low specificity                    | 47          |
| Methacrylate copolymer            | Spherical porous structure                               | Antibodies       | Specific binding of antibodies to membranes proteins of EVs                                   | Alkaline elution         | Simple, fast, cost controllable and high specificity | Low recovery                       | 21, 48, 49  |
| Conductive copolymer coated cloth | Electrochemical control                                  | Antibodies       | Specific binding of antibodies to membranes proteins of EVs                                   | Electrochemical release  | Simple, fast, cost controllable and high specificity | Low recovery and high              | 50          |
|                                   |                                                          | Aptamers         | Specific binding of aptamers to membranes proteins of EVs                                     |                          |                                                      | equipment dependence               | 54          |
| Iron oxide nanowires              | High specific surface area and strong magnetism          | Antibodies       | Specific binding of antibodies to membranes proteins of EVs                                   | Acidic elution           | Simple, fast, cost controllable and high specificity | Low recovery                       | 32          |

| <b>Material</b>                   | <b>Physical Properties</b>                                        | <b>Functions</b> | <b>Isolation principle</b>                                                | <b>Release principle</b> | <b>Advantages</b>                                           | <b>Defects</b>                  | <b>Ref.</b> |
|-----------------------------------|-------------------------------------------------------------------|------------------|---------------------------------------------------------------------------|--------------------------|-------------------------------------------------------------|---------------------------------|-------------|
| Polyamide-amine dendritic polymer | Nanometer scale, high density of active sites                     | Antibodies       | Specific binding of antibodies to membranes proteins of EVs               | No release               | High sensitivity and high specificity                       | High cost and no active release | 22          |
| Au nanoparticle                   | Nanometer scale and stable properties                             | Antibodies       | Specific binding of antibodies to membranes proteins of EVs               | No release               | Easy to operate, time efficient and high specificity        | High cost                       | 24          |
| Polystyrene microsphere           | Micron size and adjustable diameter                               | Antibodies       | Specific binding of antibodies to membranes proteins of EVs               | No release               | Simple, time-saving, cost controllable and high specificity | Low recovery                    | 23          |
| Zinc oxide nanowires              | Nanometer scale and high specific surface area                    | Aptamers         | Specific binding of aptamers to membranes proteins of EVs                 | NaCl solution            | Cost controllable and high specificity                      | Low recovery                    | 60          |
| Silicon dioxide pellets           | Micro scale, high specific surface area, dispersion and stability | Aptamers         | Specific binding of aptamers to membranes proteins of EVs                 | Alkaline elution         | Simple operation, high recovery rate and low cost           | Low specificity                 | 61          |
| Morpho wings                      | 3D micro-groove structure and high specific surface area          | Lipid probe      | The tail end of lipid probe inserted into the phospholipid bilayer of EVs | No release               | High recovery                                               | Low specificity                 | 66          |

| <b>Material</b>               | <b>Physical Properties</b>                                              | <b>Functions</b> | <b>Isolation principle</b>                                                | <b>Release principle</b> | <b>Advantages</b>                    | <b>Defects</b>  | <b>Ref.</b>             |
|-------------------------------|-------------------------------------------------------------------------|------------------|---------------------------------------------------------------------------|--------------------------|--------------------------------------|-----------------|-------------------------|
| Metal-organic framework       | Nanometer scale, high specific surface area and high porosity           | Antibody         | Specific binding of antibodies to membranes proteins of EVs               | Neutral chelating agent  | High specificity                     | High cost       | 80, 87                  |
|                               |                                                                         | Aptamers         | Specific binding of aptamers to membranes proteins of EVs                 | DNase                    | High specificity                     | Low recovery    | 70                      |
|                               |                                                                         | Lipid probe      | The tail end of lipid probe inserted into the phospholipid bilayer of EVs | No release               | Simple operation, sensitive and fast | Low specificity | 68                      |
|                               |                                                                         | Metal oxide      | Affinity between metal oxide structure and EVs phospholipid membrane      | Alkaline elution         | Simple and easy, high recovery       | Low specificity | 68, 87                  |
| TiO <sub>2</sub> beads        | Micron scale, spherical                                                 | Ti-O             | Affinity between metal oxide structure and EVs phospholipid membrane      | Alkaline elution         | Simple and easy, high recovery       | Low specificity | 75, 76, 79, 81, 82, 114 |
|                               |                                                                         | Antibody         | Specific binding of antibodies to membranes proteins of EVs               | No release               | High specificity                     | High cost       | 87                      |
| CaZrO <sub>3</sub> Nanosheets | Nanometer scale, high specific surface area and high chemical stability | Aptamers         | Specific binding of aptamers to membranes proteins of EVs                 | No release               | High specificity                     | High cost       | 78, 83                  |
|                               |                                                                         | Zr-O             | Affinity between metal oxide structure and EVs phospholipid membrane      | Alkaline elution         | High recovery                        | Low specificity | 88                      |
